# Supplementary material for: A new double-reference correction scheme for accurate and efficient computation of NMR chemical shieldings
Source: Royal Society of Chemistry journal article supplement (doi:10.1039/d2cp03992c), 2022-01-01
Supplement: d2cp03992c1.pdf [file d2cp03992c1.pdf]

Mean absolute errors (ppm) in corrected  $^1\text{H}$ ,  $^{13}\text{C}$  and  $^{19}\text{F}$  B3LYP/pc-2 nuclear shieldings, according to (1) our two-point correction scheme, and (2) using shifting and scaling parameters obtained via linear regression analysis.

|                    | $^1\text{H}$ | $^{13}\text{C}$ | $^{19}\text{F}$ |
|--------------------|--------------|-----------------|-----------------|
| (1) excl. outliers | 0.238        | 2.75            | 7.5             |
| (1) incl. outliers | 0.465        | 5.61            | 12.8            |
| (2) excl. outliers | 0.159        | 3.87            | 10.0            |
| (2) incl. outliers | 0.450        | 6.14            | 12.8            |
